# Supplementary material
Source: PubMed Central journal article supplement (PMC4718459)
Supplement: EMBJ-35-208-s010.pdf [file EMBJ-35-208-s010.pdf]

**A**

| Bax        | Q171C |    |    |    |    |
|------------|-------|----|----|----|----|
| Urea       | -     | -  | -  | +  | +  |
| CHAPS      | -     | -  | +  | -  | +  |
| IASD (min) | 0     | 30 | 30 | 30 | 30 |
| $M_r$      | 1     | 2  | 3  | 4  | 5  |

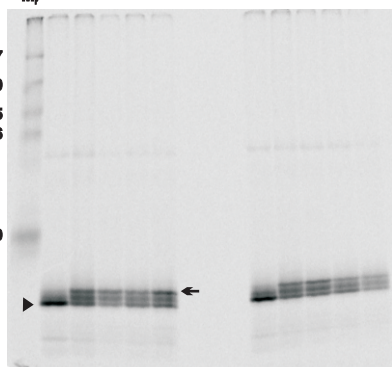

| I175C      |   |    |    |    |    |
|------------|---|----|----|----|----|
| Urea       | - | -  | -  | +  | +  |
| CHAPS      | - | -  | +  | -  | +  |
| IASD (min) | 0 | 30 | 30 | 30 | 30 |
| $M_r$      | 1 | 2  | 3  | 4  | 5  |

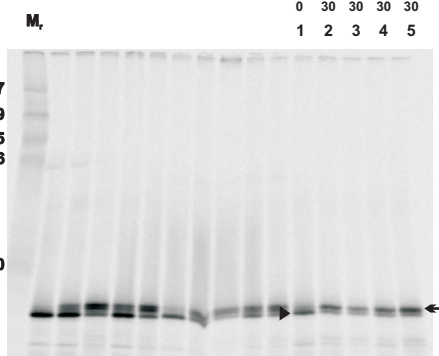

| V177C      |   |    |    |    |    |
|------------|---|----|----|----|----|
| Urea       | - | -  | -  | +  | +  |
| CHAPS      | - | -  | +  | -  | +  |
| IASD (min) | 0 | 30 | 30 | 30 | 30 |
| $M_r$      | 1 | 2  | 3  | 4  | 5  |

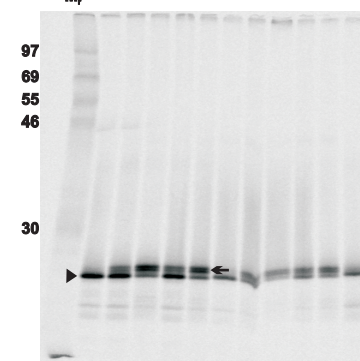

| Bax        | A178C |    |    |    |    |
|------------|-------|----|----|----|----|
| Urea       | -     | -  | -  | +  | +  |
| CHAPS      | -     | -  | +  | -  | +  |
| IASD (min) | 0     | 30 | 30 | 30 | 30 |
| $M_r$      | 1     | 2  | 3  | 4  | 5  |

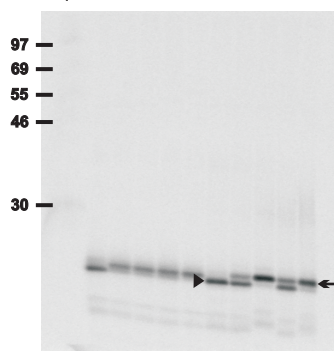

| G179C      |   |    |    |    |    |
|------------|---|----|----|----|----|
| Urea       | - | -  | -  | +  | +  |
| CHAPS      | - | -  | +  | -  | +  |
| IASD (min) | 0 | 30 | 30 | 30 | 30 |
| $M_r$      | 1 | 2  | 3  | 4  | 5  |

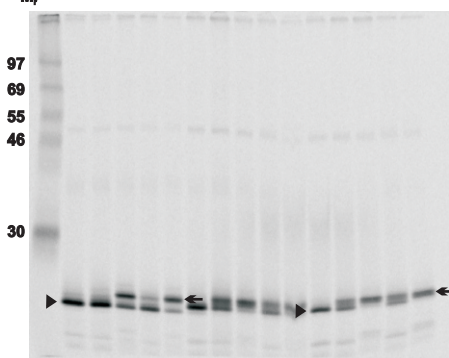

| V180C      |   |    |    |    |    |
|------------|---|----|----|----|----|
| Urea       | - | -  | -  | +  | +  |
| CHAPS      | - | -  | +  | -  | +  |
| IASD (min) | 0 | 30 | 30 | 30 | 30 |
| $M_r$      | 1 | 2  | 3  | 4  | 5  |

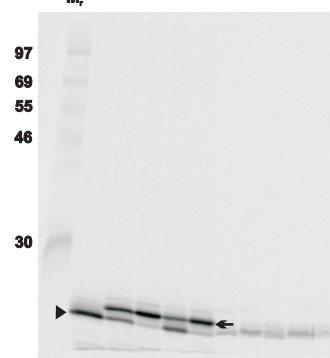

| T182C      |   |    |    |    |    |
|------------|---|----|----|----|----|
| Urea       | - | -  | -  | +  | +  |
| CHAPS      | - | -  | +  | -  | +  |
| IASD (min) | 0 | 30 | 30 | 30 | 30 |
| $M_r$      | 1 | 2  | 3  | 4  | 5  |

| Bax        | A183C |    |    |    |    | I187C |    |    |    |    |
|------------|-------|----|----|----|----|-------|----|----|----|----|
| Urea       | -     | -  | -  | +  | +  | -     | -  | -  | +  | +  |
| CHAPS      | -     | -  | +  | -  | +  | -     | -  | +  | -  | +  |
| IASD (min) | 0     | 30 | 30 | 30 | 30 | 0     | 30 | 30 | 30 | 30 |
| $M_r$      | 1     | 2  | 3  | 4  | 5  | 1     | 2  | 3  | 4  | 5  |

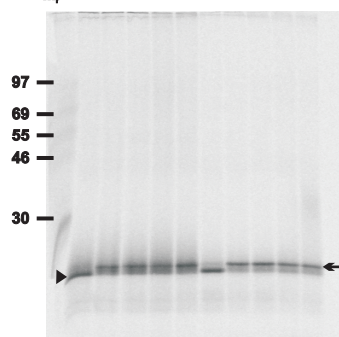

| L185C      |   |    |    |    |    |
|------------|---|----|----|----|----|
| Urea       | - | -  | -  | +  | +  |
| CHAPS      | - | -  | +  | -  | +  |
| IASD (min) | 0 | 30 | 30 | 30 | 30 |
| $M_r$      | 1 | 2  | 3  | 4  | 5  |

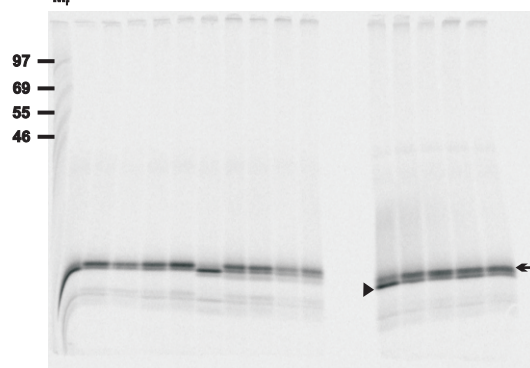

Source Data for Figure 5
