# Supplementary material
Source: PubMed Central journal article supplement (PMC4718459)

**B**

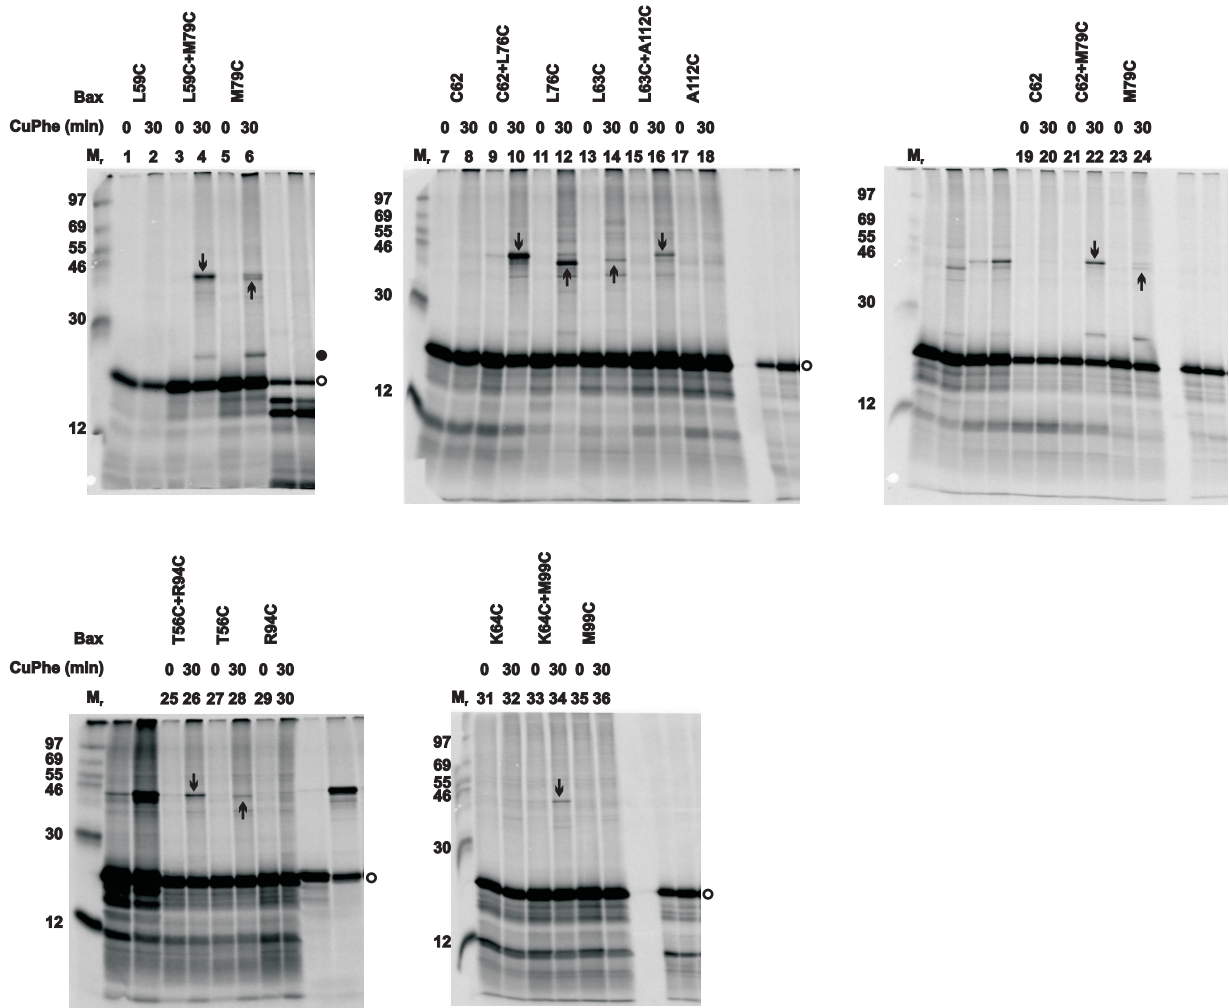

**C**

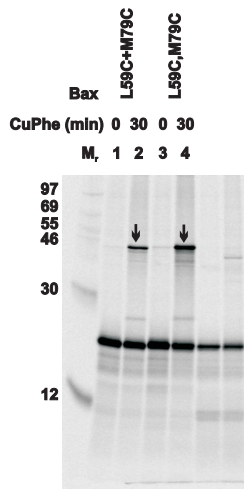

**D**

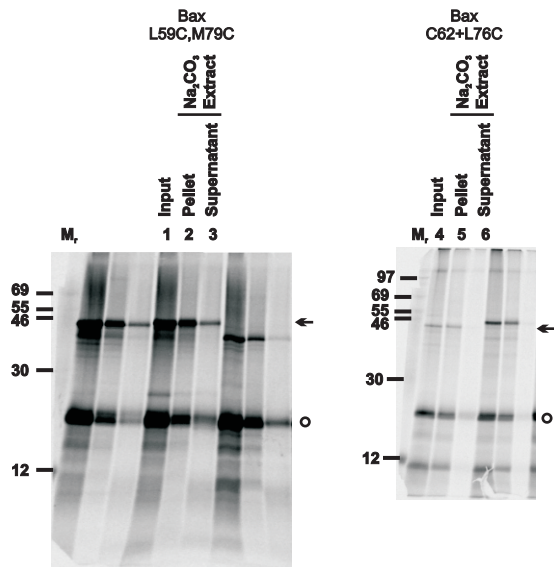

Supplement: EMBJ-35-208-s006.pdf [file EMBJ-35-208-s006.pdf]

**B**

$\alpha 2$

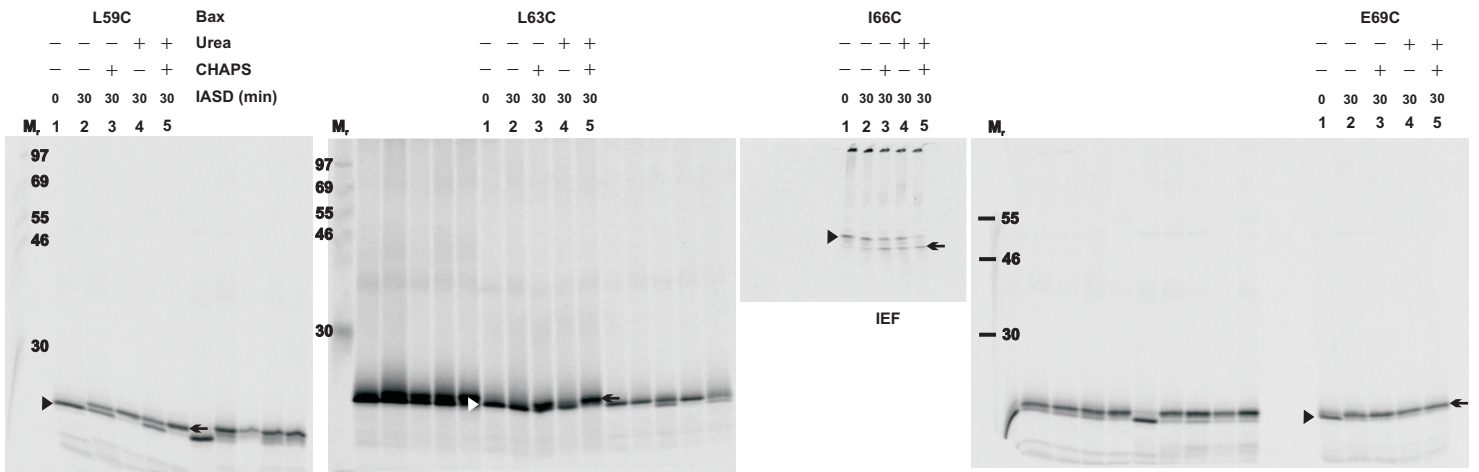

$\alpha 2$

$\alpha 3$

$\alpha 4$

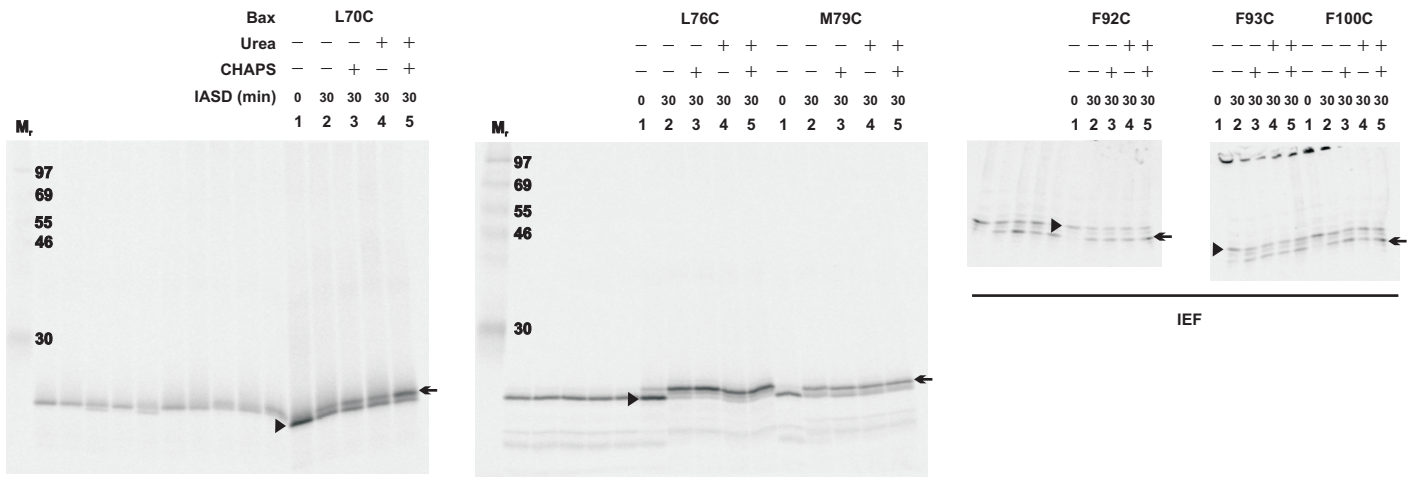

$\alpha 5$

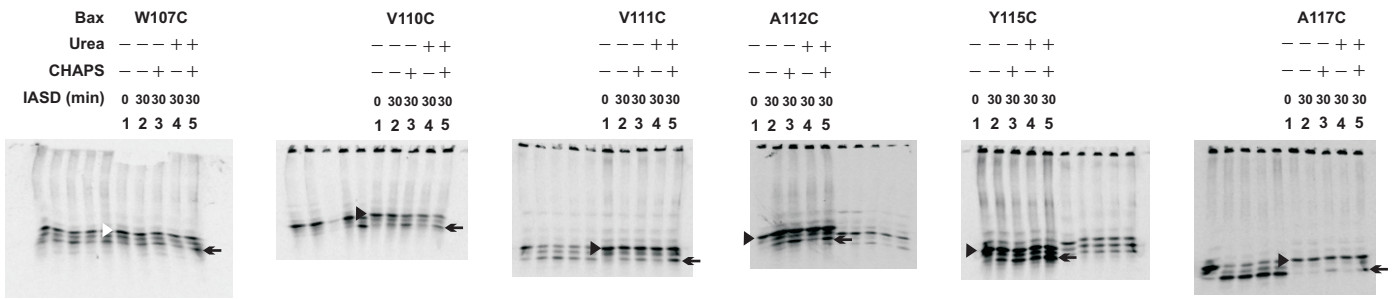

IEF

$\alpha 5$

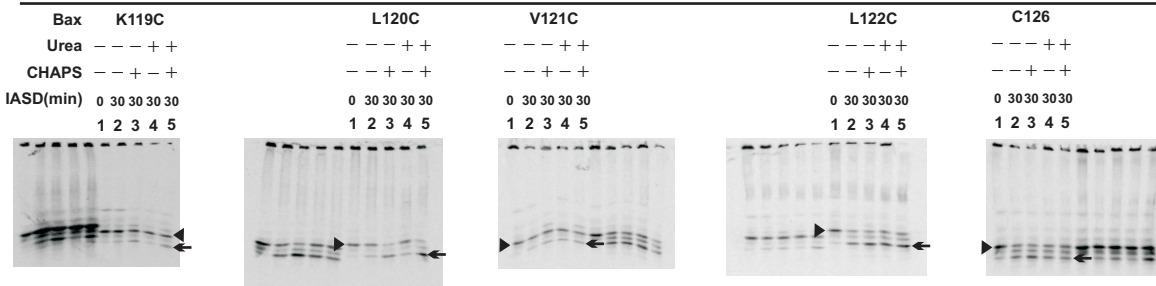

IEF

Supplement: EMBJ-35-208-s007.pdf [file EMBJ-35-208-s007.pdf]

**A**

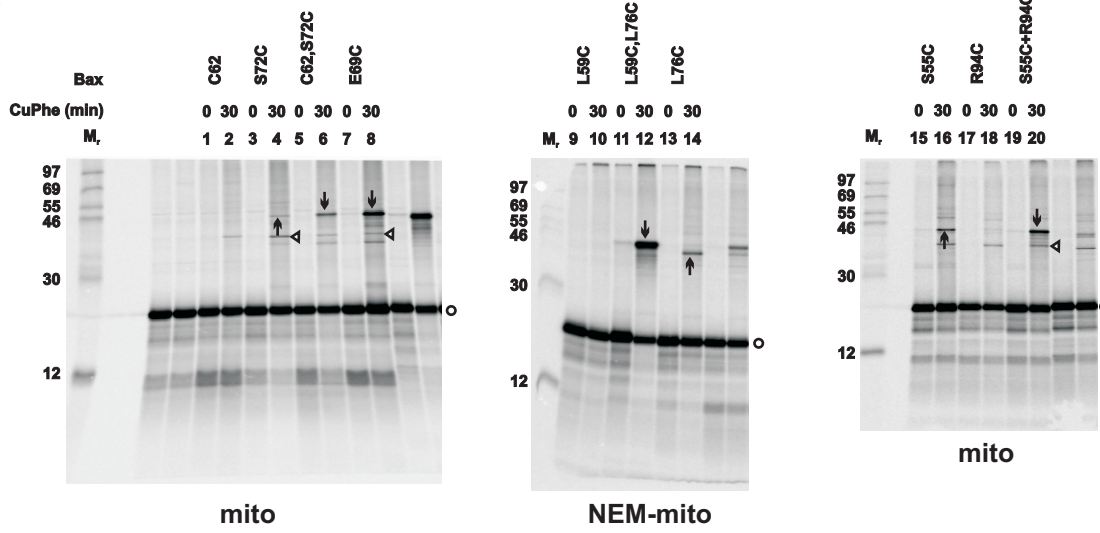

**B**

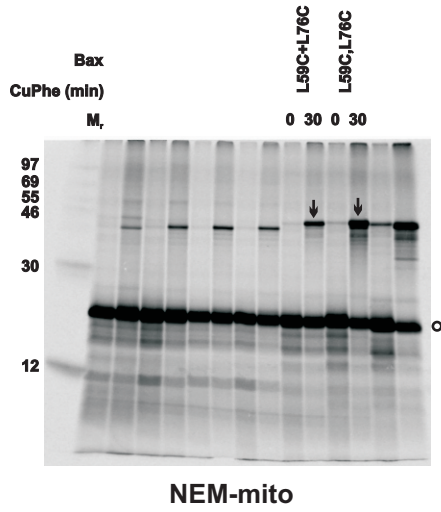

**C**

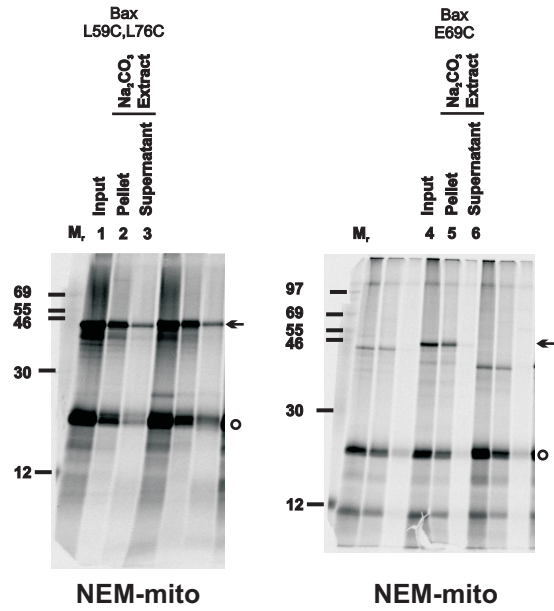

Source Data for Figure 3

Supplement: EMBJ-35-208-s008.pdf [file EMBJ-35-208-s008.pdf]

**B**

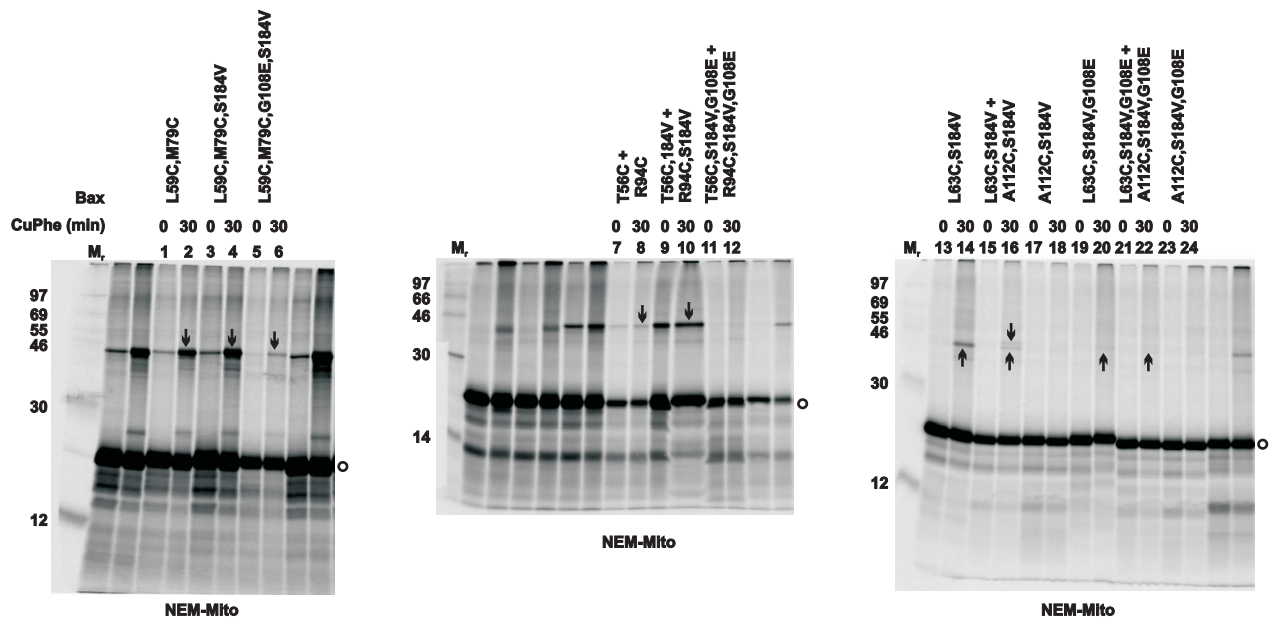

**C**

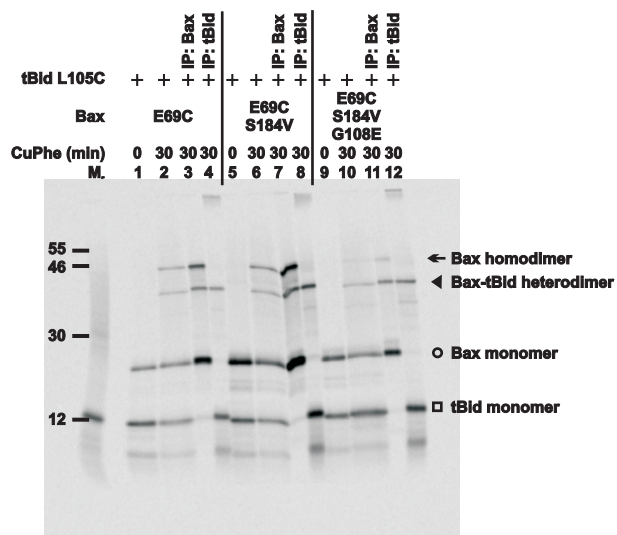

**D**

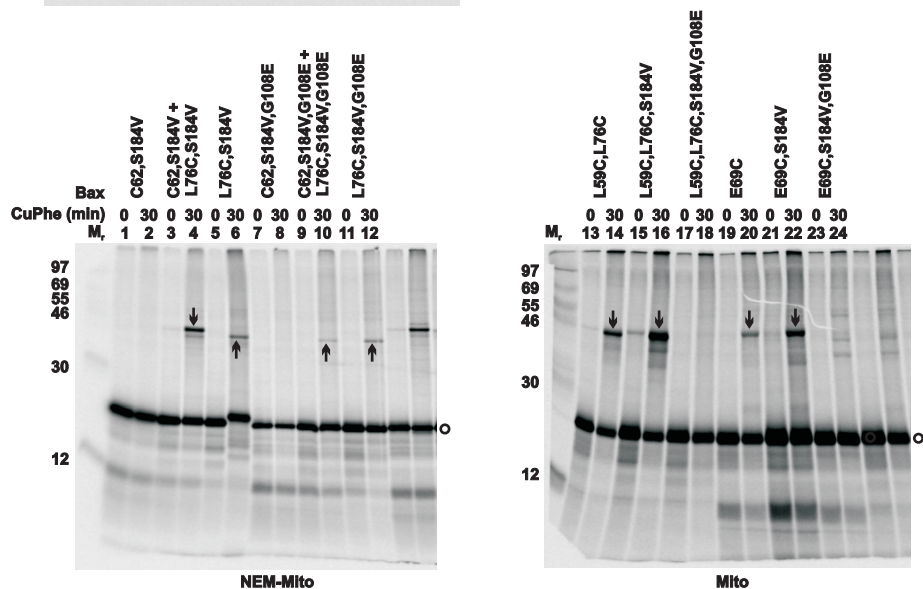

Supplement: EMBJ-35-208-s009.pdf [file EMBJ-35-208-s009.pdf]

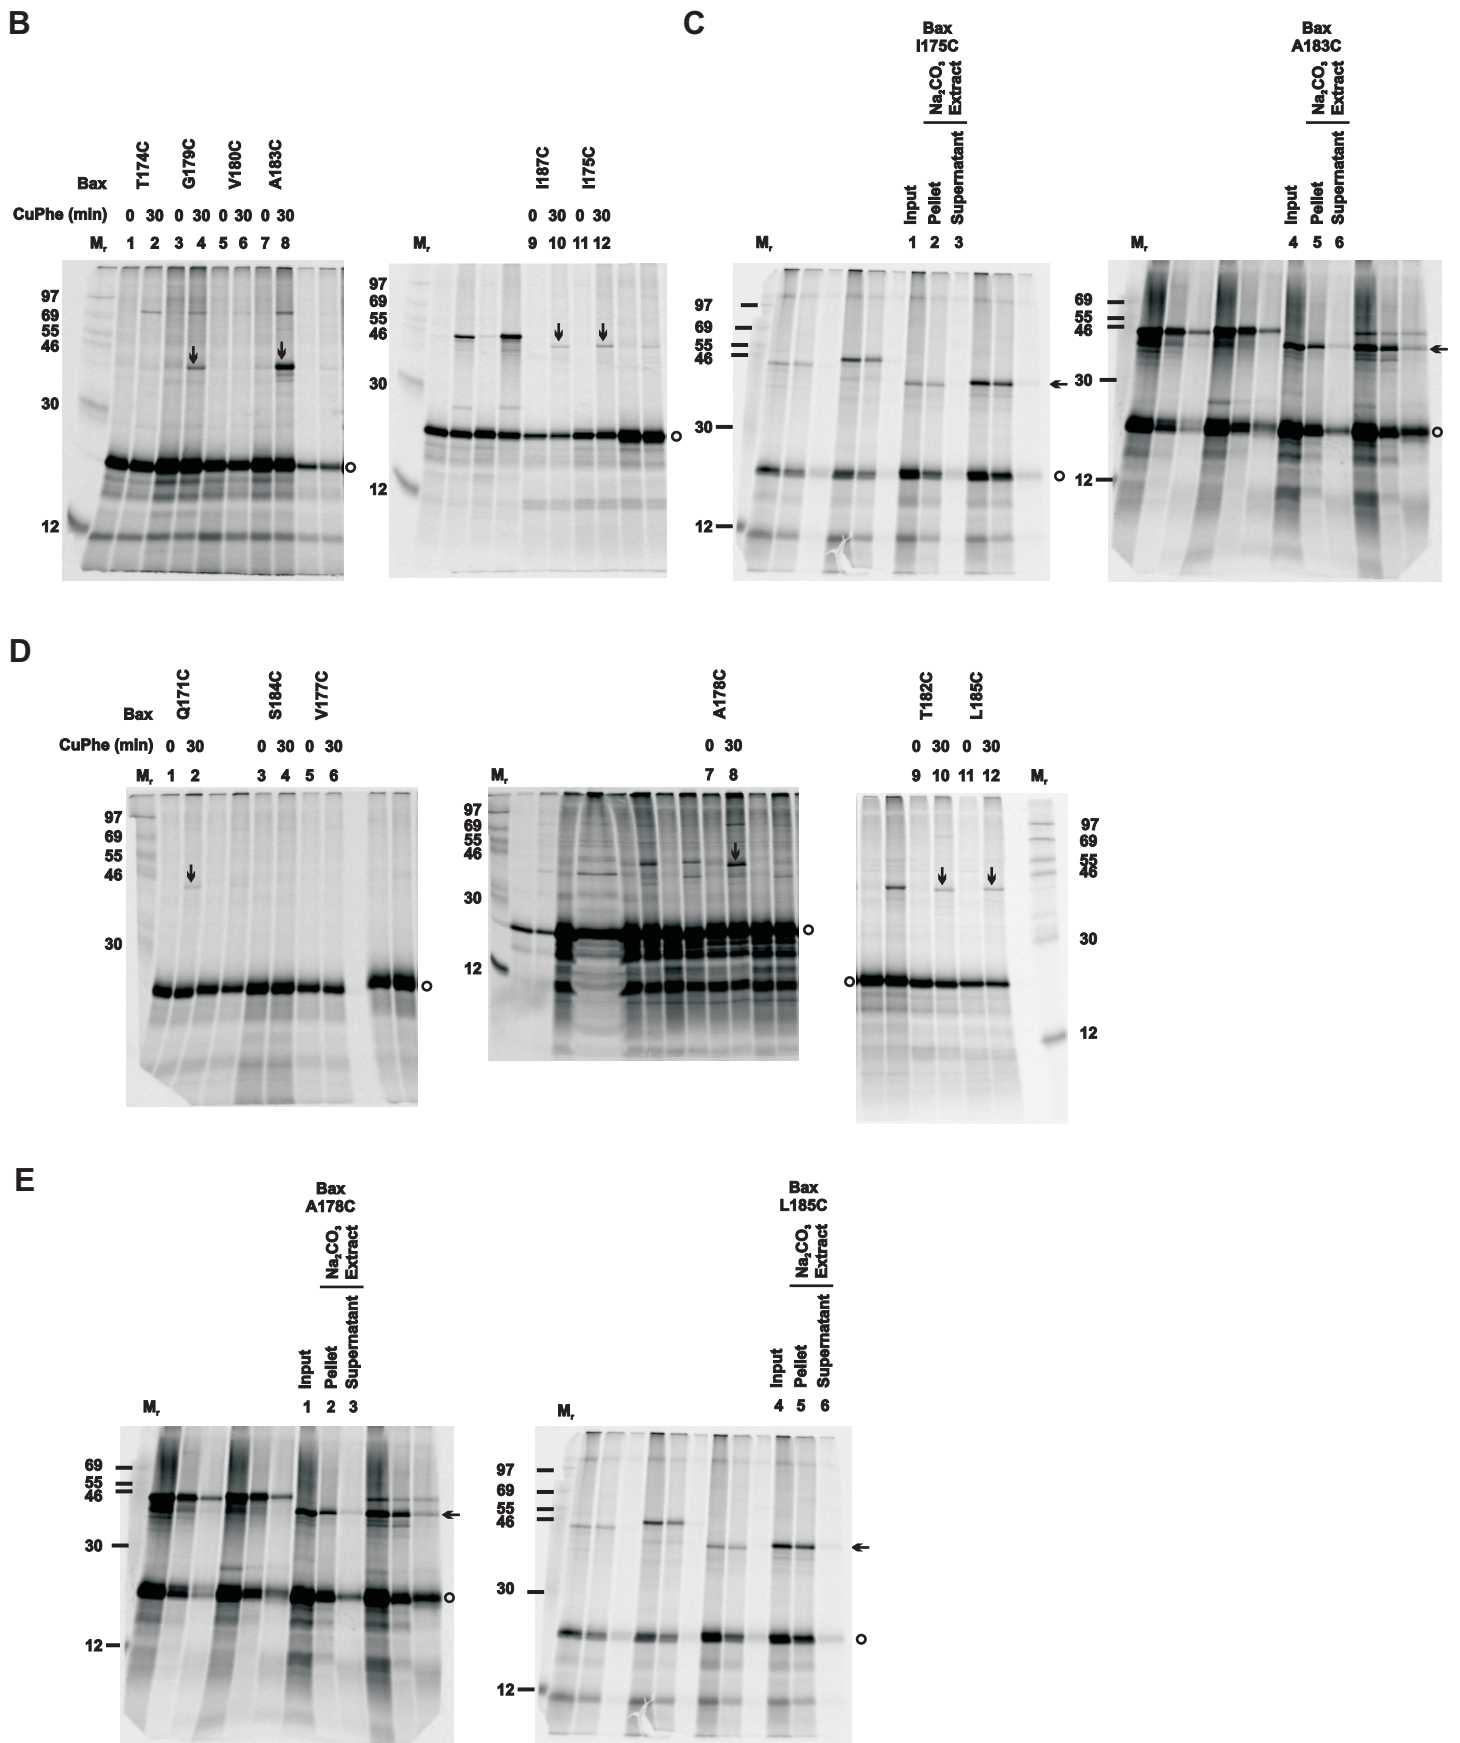

Source Data for Figure 6

Supplement: EMBJ-35-208-s011.pdf [file EMBJ-35-208-s011.pdf]

**B**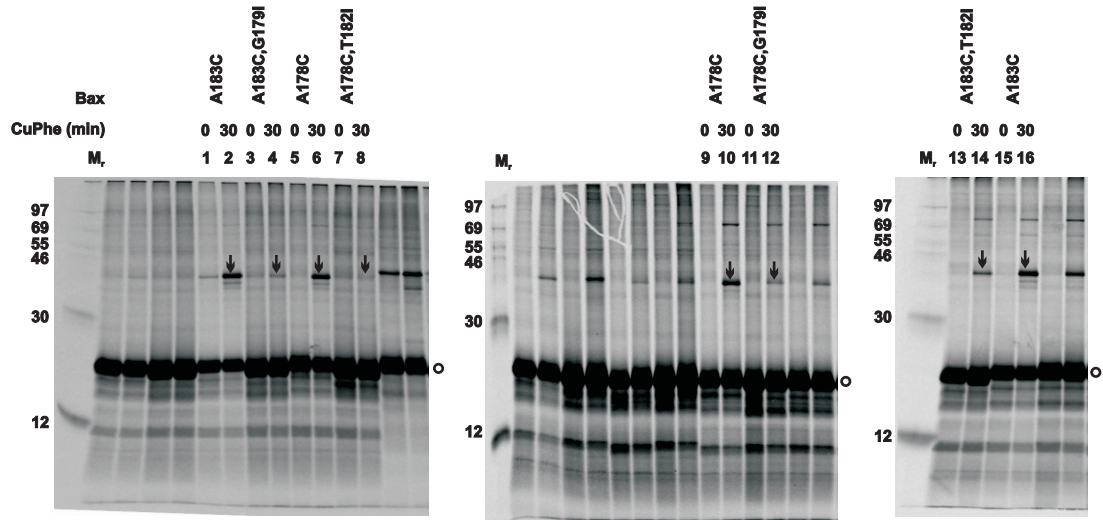**C**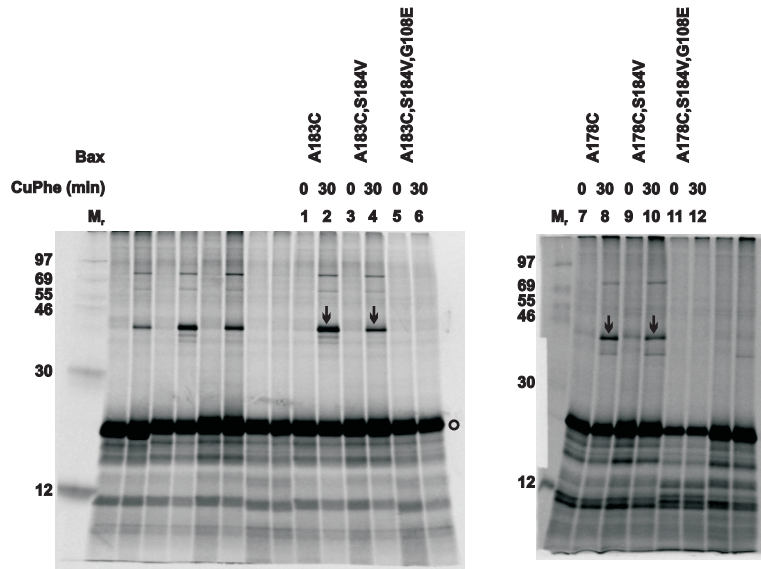**D**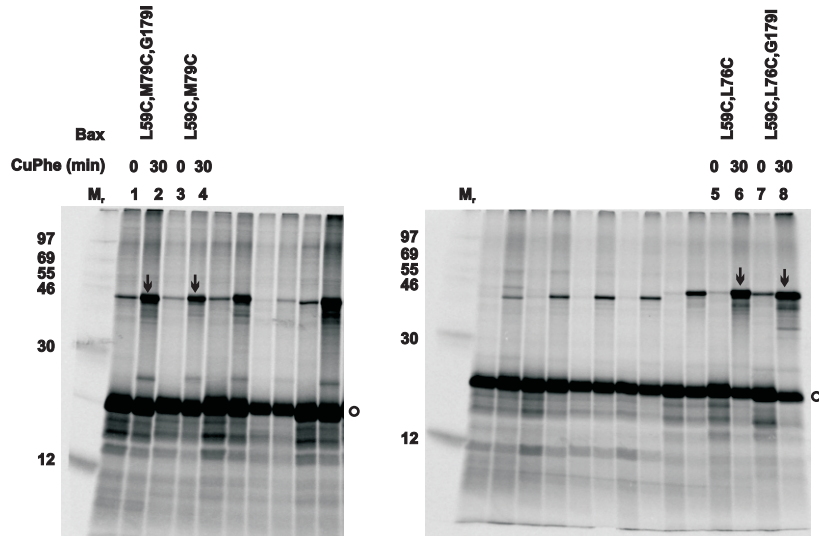

Supplement: EMBJ-35-208-s012.pdf [file EMBJ-35-208-s012.pdf]

**A**

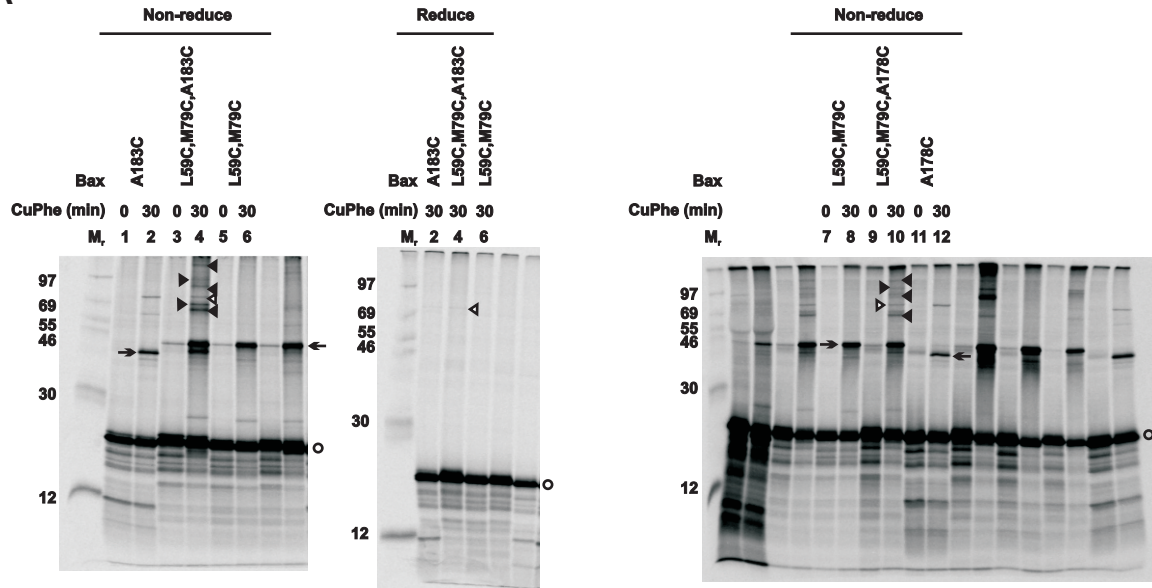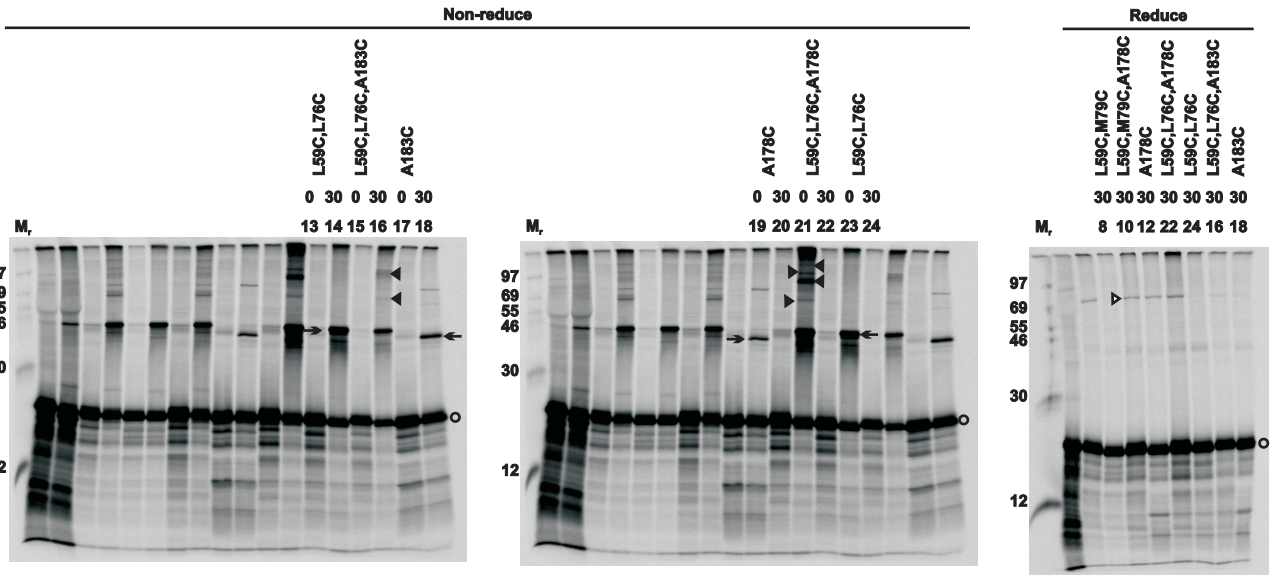

**B**

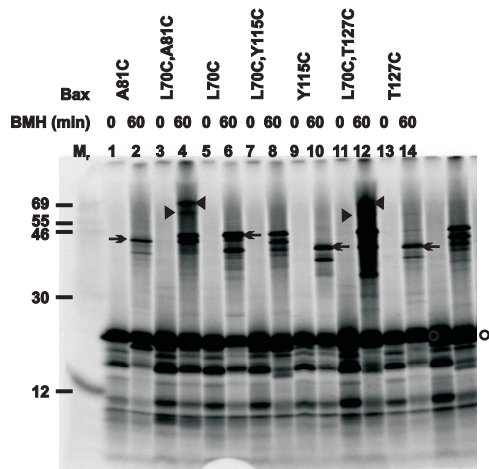

Supplement: EMBJ-35-208-s013.pdf [file EMBJ-35-208-s013.pdf]

D

$\alpha 9$

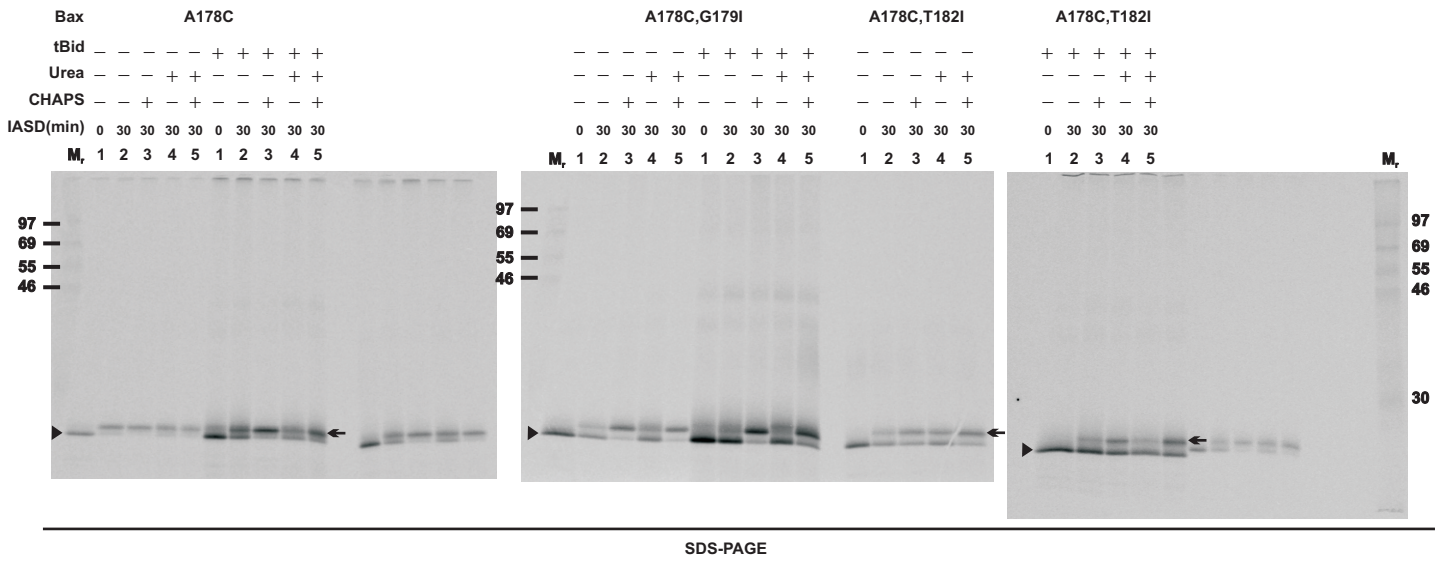

$\alpha 5$

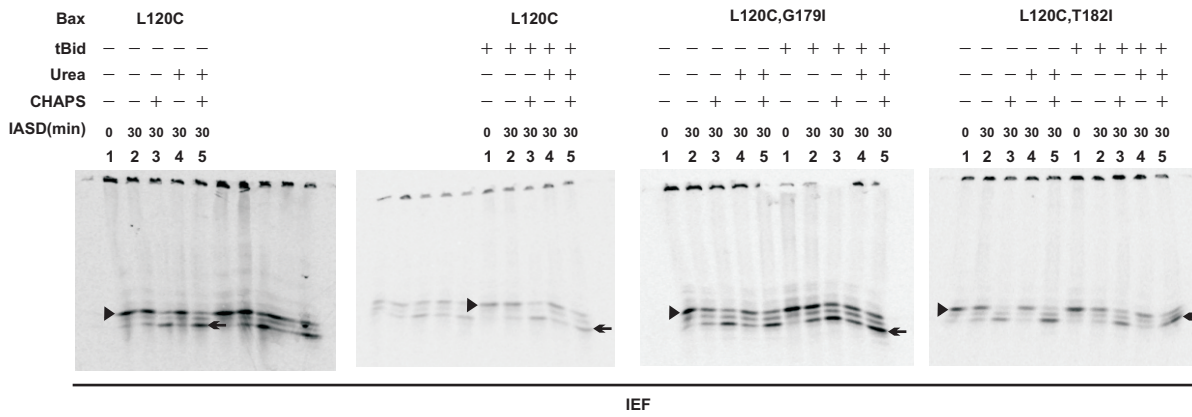

Source Data for Figure 10

Supplement: EMBJ-35-208-s014.pdf [file EMBJ-35-208-s014.pdf]
